# Supplementary material for: Deciphering multiple sclerosis disability with deep learning attention maps on clinical MRI
Source: PubMed Central journal article supplement — Neuroimage Clin. 2023 Mar 15;38:103376. doi: 10.1016/j.nicl.2023.103376 (PMC10034138; doi:10.1016/j.nicl.2023.103376), 2023-03-15
Supplement: mmc1.pdf [file mmc1.pdf]

# Supplementary material

## Threshold selection

In order to analyse the distribution of voxels of the attention maps that were located across the different anatomical areas, different thresholds were studied from the percentile of data of each case. Since values obtained with the attention maps were close to zero, a percentile below 75%, resulted in some cases with the inclusion of all voxels in the image. Therefore, we analysed different thresholds from percentile 75% Supplementary Fig.1 shows the comparison of the different thresholds analysed. Note that the obtained regional distributions were similar. These results illustrate that the voxels with a higher relevance lead the decisions and the surroundings reaffirm them.

(A)

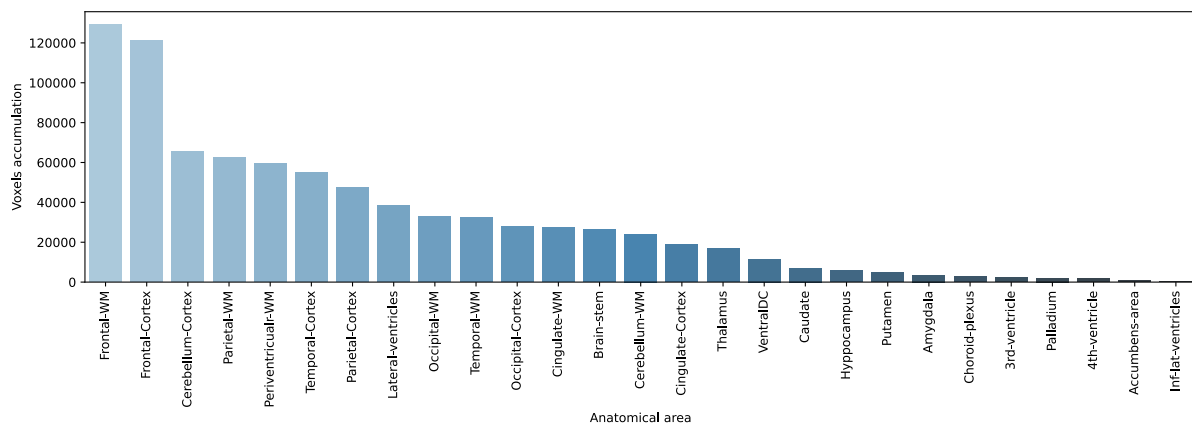

(B)

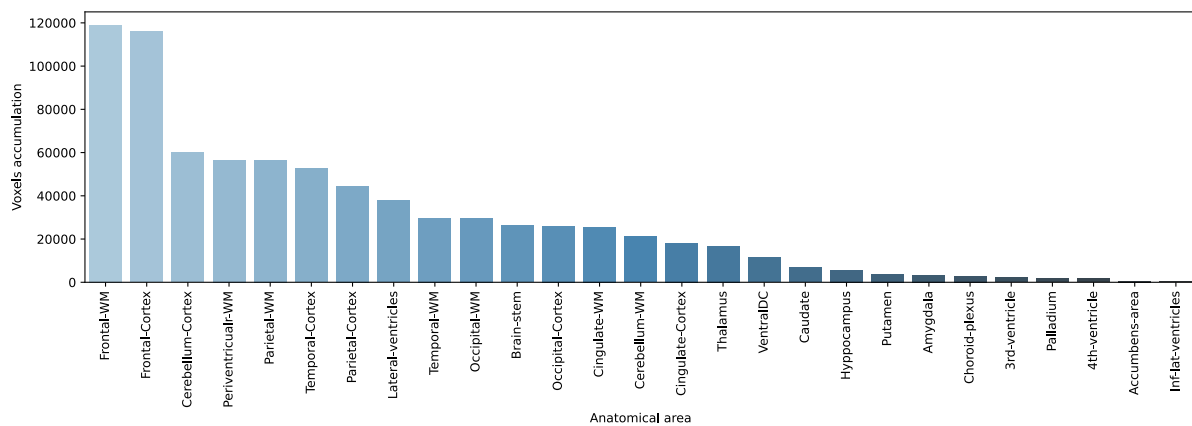

(C)

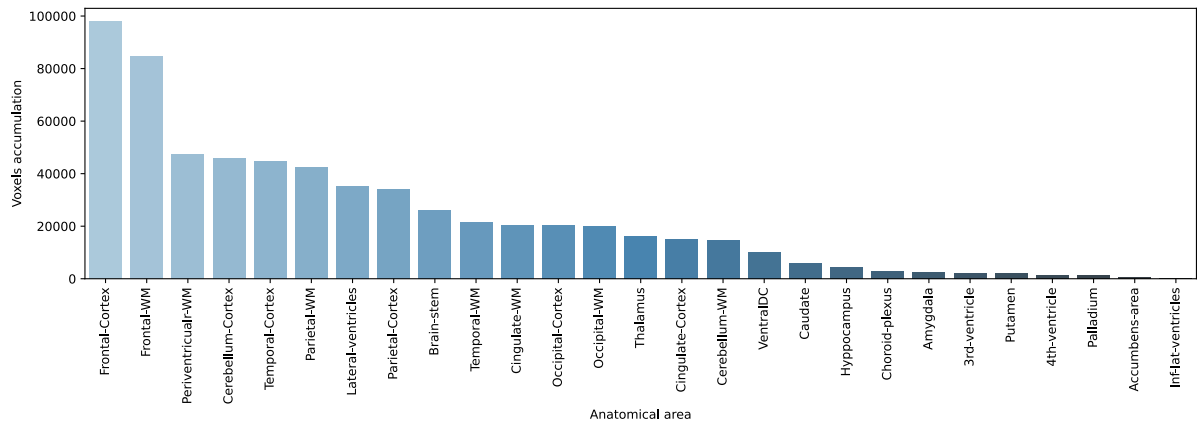

(D)

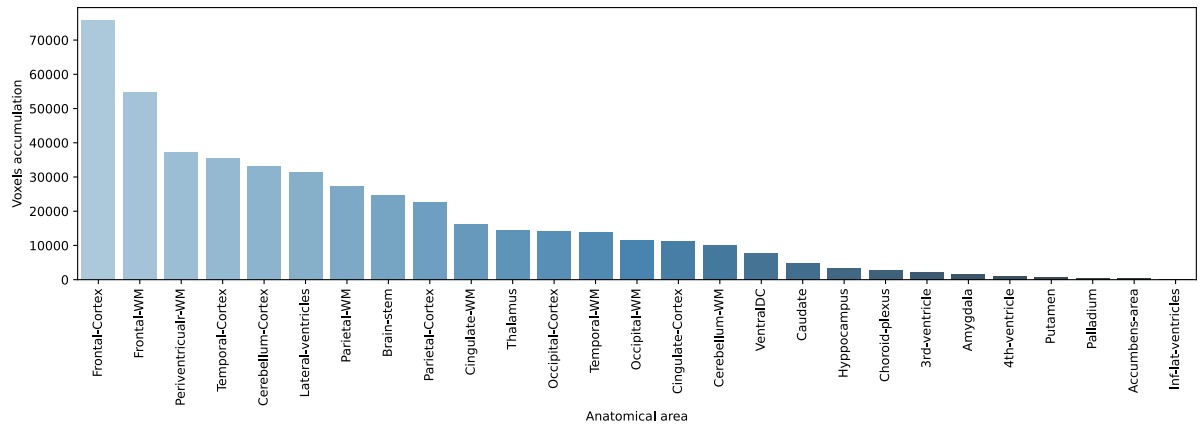

(E)

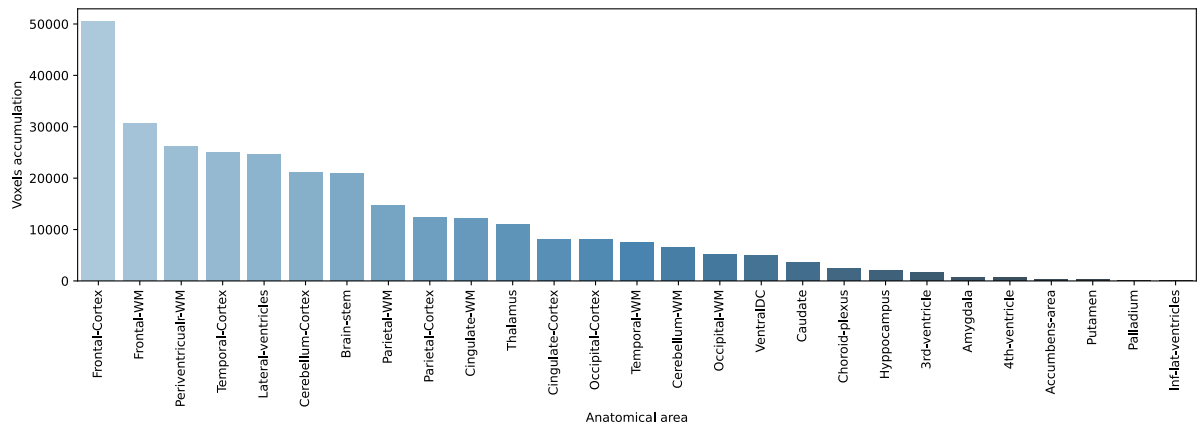

(F)

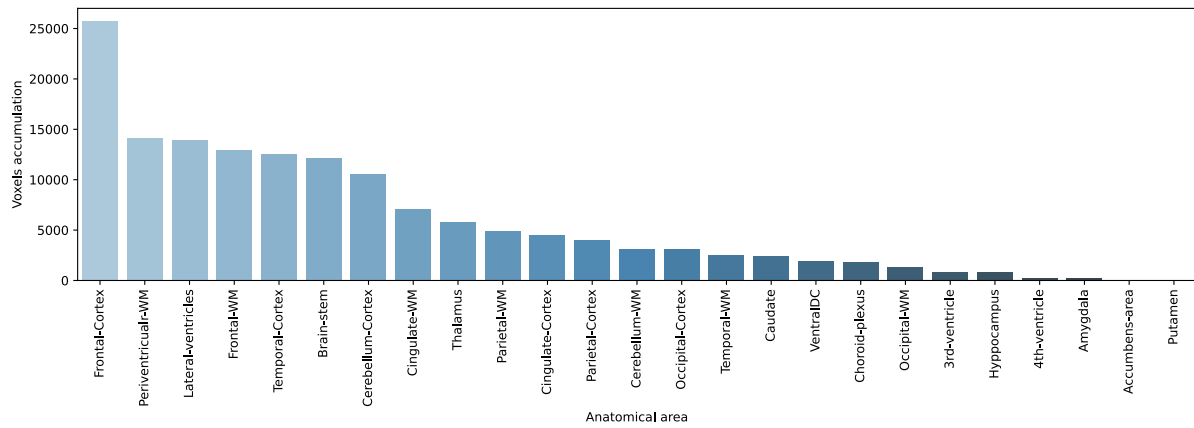

(G)

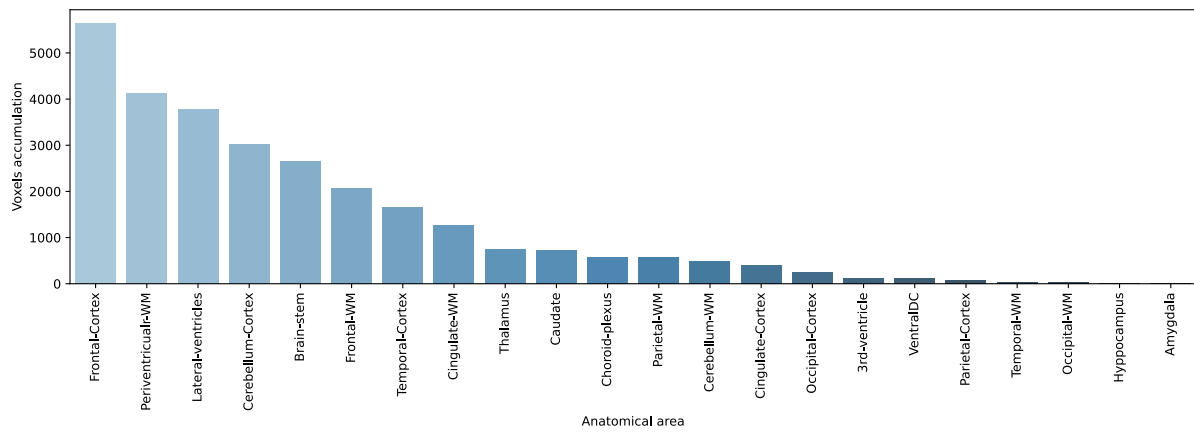

**Supplementary Figure 1. Different percentile threshold binarisation. (A)** Threshold at the median of positive values, **(B)** 75% percentile, **(C)** 80% percentile, **(D)** 85% percentile, **(E)** 90% percentile, **(F)** 95% percentile and **(G)** 99% percentile.
